# Supplementary figures and images for: Design of metal-organic NLO materials: complexes derived from pyridine-3,4-dicarboxylate
Source: Royal Society of Chemistry journal article supplement (doi:10.1039/b401802h), 2004-01-01

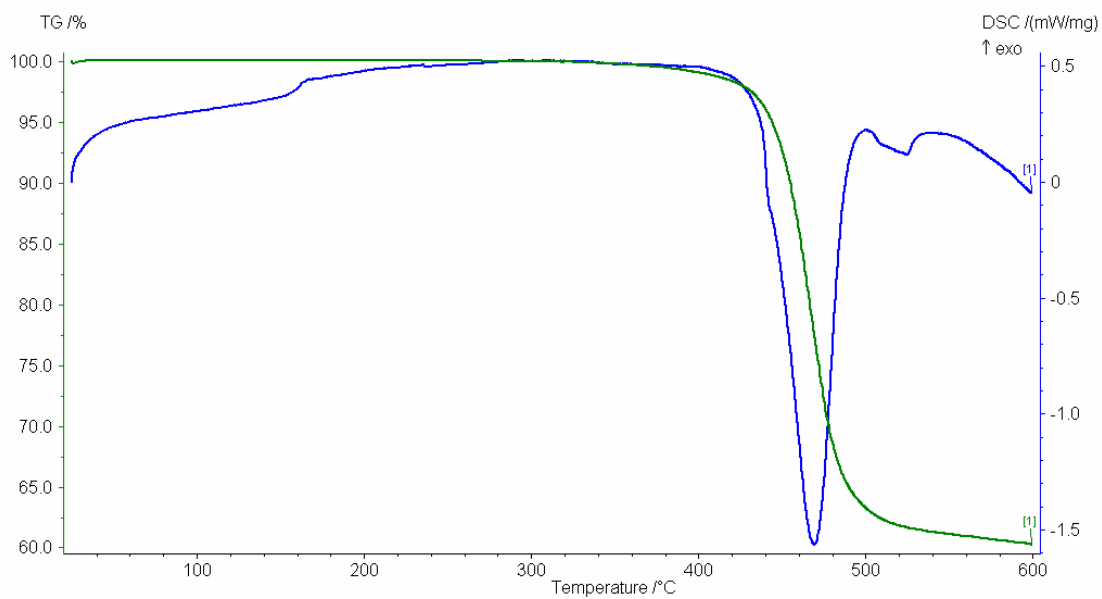

Fig. 1 TGA/DSC of complex 1

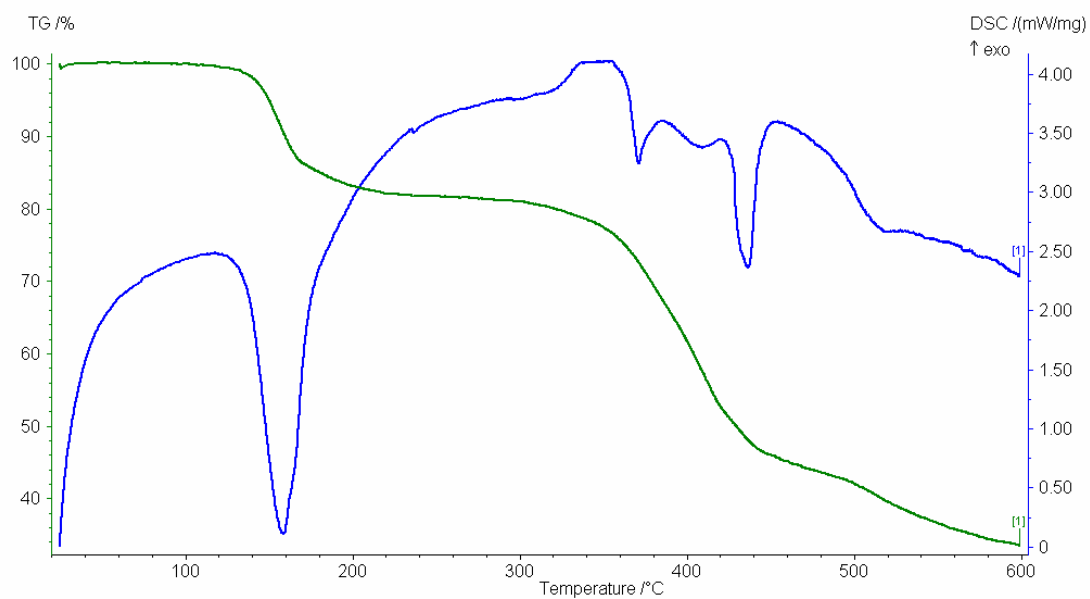

Fig. 2 TGA/DSC of complex 2

Supplement: b401802h.pdf [file b401802h.pdf]
